# Supplementary material
Source: publisher site journal article supplement (https://www.dovepress.com/article/611424)
Supplement: Supplementary file 1 [file 611424%20Revised%20Supplementary%20Tables.docx]

**Supplementary Table 1**. Univariable logistic regression analysis for postoperative CD after BGI surgery

| Variable | OR | 95% CI | P*-*value |
| --- | --- | --- | --- |
| Age, per year | 1.06 | 1.03–1.10 | <0.01 |
| Sex (Male/Female) | 0.80 | 0.42–1.53 | 0.49 |
| Diabetes mellitus | 0.67 | 0.34–1.27 | 0.22 |
| Hypertension | 1.79 | 0.95–3.43 | 0.07 |
| Type of glaucoma (Exfoliation glaucoma/other) | 1.94 | 0.97–3.78 | 0.06 |
| Lens status (Phakia/other) | 0.54 | 0.18–1.33 | 0.19 |
| Number of previous intraocular surgeries, per each | 0.99 | 0.73–1.32 | 0.96 |
| Previous glaucoma filtration surgery | 2.00 | 1.07–3.80 | 0.03 |
| Previous pars plana vitrectomy | 0.35 | 0.15–0.74 | <0.01 |
| Axial length, per mm | 0.82 | 0.68–0.97 | 0.02 |
| Corneal thickness, per µm | 1.00 | 0.99–1.01 | 0.56 |
| Combined surgery (Alone/Phacoemulsification) | 2.16 | 0.81–7.51 | 0.13 |
| Type of implant (BG101-350/ BG102-350) | 1.88 | 0.80–5.16 | 0.16 |
| Endplate position (Superotemporal/other) | 0.94 | 0.36–2.94 | 0.91 |
| Tube insertion site |  |  | 0.05 |
| Anterior chamber vs Vitreous cavity | 2.19 | 0.92–5.81 | 0.08 |
| Ciliary sulcus vs Vitreous cavity | 3.05 | 1.24–8.29 | 0.01 |
| Anterior chamber vs Ciliary sulcus | 0.72 | 0.36–1.45 | 0.35 |
| Preoperative IOP, per mmHg | 0.98 | 0.94–1.01 | 0.16 |
| Preoperative glaucoma medications, per medication | 1.05 | 0.81–1.37 | 0.72 |
| Postoperative day 1 IOP, per mmHg | 0.94 | 0.90–0.97 | <0.01 |
| Lowest postoperative IOP within 7 days, per mmHg | 0.78 | 0.72–0.84 | <0.01 |
| ΔIOP (preoperative IOP − lowest postoperative IOP within 7 days), per mmHg | 1.05 | 1.02–1.08 | <0.01 |

**Abbreviations:** OR, odds ratio; CI, confidence interval; IOP, intraocular pressure; ΔIOP, magnitude of postoperative IOP reduction.

**Supplementary Table 2**. Comparison of clinical characteristics between early-onset and delayed-onset CD after BGI surgery

| Characteristics | Early CD  (n = 37) | Delayed CD  (n = 11) | P*-*value |
| --- | --- | --- | --- |
| Age, years | 73.4±12.0 | 76.8±9.9 | 0.67 |
| Sex, Male/Female, n | 23/14 | 6/5 | 0.73 |
| Diabetes mellitus, n (%) | 13 (35.1) | 4 (36.4) | 1.00 |
| Hypertension, n (%) | 23 (62.2) | 6 (54.6) | 0.73 |
| Glaucoma subtype, n (%) |  |  | 0.12 |
| Primary open-angle glaucoma | 10 (27.0) | 1 (9.1) |  |
| Exfoliation glaucoma | 13 (35.2) | 4 (36.4) |  |
| Primary angle-closure glaucoma | 1 (2.7) | 2 (18.1) |  |
| Neovascular glaucoma | 6 (16.2) | 0 (0.0) |  |
| Other secondary glaucoma | 7 (18.9) | 4 (36.4) |  |
| Lens status, n (%) |  |  | 0.56 |
| Phakia | 3 (8.1) | 2 (18.2) |  |
| Pseudophakia | 33 (89.2) | 9 (81.8) |  |
| Aphakia | 1 (2.7) | 0 (0.0) |  |
| Number of previous intraocular surgeries, n | 2.3±1.5 | 1.4±0.5 | 0.01 |
| Previous glaucoma filtration surgery, n (%) | 21 (56.8) | 5 (45.5) | 0.73 |
| Previous pars plana vitrectomy, n (%) | 9 (24.3) | 0 (0.0) | 0.10 |
| Axial length, mm | 24.4±2.2 | 23.1±0.7 | 0.03 |
| Corneal thickness, µm | 528.6±38.9 | 531.7±44.6 | 0.93 |
| Combined surgery, n (%) |  |  | 0.22 |
| Alone | 35 (94.6) | 9 (81.8) |  |
| Phacoemulsification | 2 (5.4) | 2 (18.2) |  |
| Type of implant, n (%) |  |  | 0.31 |
| BG101-350 | 31 (83.8) | 11 (100.0) |  |
| BG102-350 | 6 (16.2) | 0 (0.0) |  |
| Endplate position, n (%) |  |  | 0.07 |
| Superotemporal | 35 (94.6) | 8 (72.7) |  |
| Inferotemporal | 2 (5.4) | 2 (18.2) |  |
| Superonasal | 0 (0.0) | 1 (9.1) |  |
| Tube insertion site, n (%) |  |  | 0.02 |
| Anterior chamber | 13 (35.1) | 9 (81.8) |  |
| Ciliary sulcus | 17 (46.0) | 2 (18.2) |  |
| Vitreous cavity | 7 (18.9) | 0 (0.0) |  |
| Preoperative IOP, mmHg | 29.5±9.1 | 33.3±7.9 | 0.13 |
| Preoperative glaucoma medications, n | 3.9±1.2 | 3.9±1.1 | 0.82 |
| Postoperative day 1 IOP, mmHg | 9.6±7.4 | 30.8±18.4 | <0.01 |
| Lowest postoperative IOP before CD onset, mmHg | 3.8±1.7 | 5.3±3.2 | 0.24 |
| ΔIOP (preoperative IOP − lowest postoperative IOP before CD onset), mmHg | 25.7±8.9 | 28.0±7.4 | 0.26 |

Continuous variables were compared using the Mann–Whitney U test, and categorical variables were compared using the chi-squared test or Fisher’s exact test.

**Abbreviations**: CD, choroidal detachment; IOP, intraocular pressure; ΔIOP, magnitude of postoperative IOP reduction.
